# Supplementary material
Source: publisher figshare collection journal article supplement (https://wiley.figshare.com/articles/dataset/_/3518795)
Supplement: Supplementary file 1 [file 1 › appendix-A.htm]

Ecological Archives A023-077-A1


*Ecological Archives* A023-077-A1

Tarik C. Gouhier, Frédéric Guichard, Bruce A. Menge. 2013. Designing effective reserve networks for nonequilibrium metacommunities. *Ecological Applications* 23:1488–1503. http://dx.doi.org/10.1890/12-1801.1

Appendix A. The effects of a type III predator functional response on the effectiveness of reserve networks.

> View / download PDF.


---

[Back to A023-077]
